# Supplementary material
Source: PubMed Central journal article supplement (PMC3111323)
Supplement: 1104627108_pnas.1104627108_SI.pdf [file 1104627108_pnas.1104627108_SI.pdf]

# Supporting Information

Cerling et al. 10.1073/pnas.1104627108

Table S1. Fossil equids, giraffes, hippos, and suids from Kay Behrensmeier Site (KBS) and Okote Members, Koobi Fora region, Kenya

| Sample number         | Genus and species                       | $\delta^{13}\text{C}$ | $\delta^{18}\text{O}$ | Tooth     | Member |
|-----------------------|-----------------------------------------|-----------------------|-----------------------|-----------|--------|
| <i>Equidae</i>        |                                         |                       |                       |           |        |
| F5066                 | <i>Equus</i> sp. indet.                 | -2.5                  | -3.8                  | m1 or m2  | Okote  |
| F5070                 | <i>Equus</i> sp. indet.                 | -2.1                  | -1.9                  | Lp3       | Okote  |
| K92-4832              | <i>Hipparion</i> sp.                    | -2.1                  | -1.2                  | M3        | Okote  |
| KNM ER 1224           | <i>Equus</i> sp. indet.                 | -0.3                  | 0.0                   | Lp2       | KBS    |
| KNM ER 1227           | <i>Equus</i> cf. <i>grevyi</i>          | -0.7                  | 1.6                   | P3 or P4  | Okote  |
| KNM ER 1250           | <i>Equus koobiforensis</i>              | 0.7                   | 4.0                   | RM3       | KBS    |
| KNM ER 1255           | <i>Equus koobiforensis</i>              | -0.9                  | 2.6                   | LM2       | KBS    |
| KNM ER 1259           | <i>Equus</i> sp. indet.                 | -0.1                  | 1.8                   | RP3       | KBS    |
| KNM ER 1259           | <i>Equus</i> sp. indet.                 | -0.8                  | 0.2                   | LP3       | KBS    |
| KNM ER 2064           | <i>Equus</i> sp. indet.                 | -0.1                  | 2.0                   | RP3 or P4 | KBS    |
| KNM ER 2066           | <i>Equus grevyi</i> ?                   | 0.7                   | 1.6                   | M1 or M2  | Okote  |
| KNM ER 2642           | <i>Hipparion</i> sp.                    | -0.1                  | 3.9                   | LM3       | KBS    |
| KNM ER 2642           | <i>Hipparion</i> sp.                    | -1.2                  | 1.2                   | LM3       | KBS    |
| KNM ER 2668           | <i>Hipparion</i> cf. <i>aethiopicum</i> | 0.1                   | 0.3                   | P2        | Okote  |
| KNM ER 2672           | <i>Equus</i> cf. <i>grevyi</i>          | -1.1                  | 2.8                   | M1 or M2  | Okote  |
| KNM ER 2680           | <i>Equus</i> cf. <i>grevyi</i>          | 0.5                   | -1.0                  | P3 or P4  | Okote  |
| KNM ER 2684           | <i>Equus</i> cf. <i>grevyi</i>          | -0.6                  | 2.0                   | P3 or P4  | Okote  |
| KNM ER 4030           | <i>Equus</i> sp. indet.                 | 1.3                   | -1.2                  | M1 or M2  | KBS    |
| KNM ER 5359           | <i>Hipparion</i> sp.                    | -0.4                  | 7.1                   | RM1 or M2 | KBS    |
|                       | average                                 | -0.4                  | 1.4                   |           |        |
|                       | SD                                      | 0.9                   | 2.2                   |           |        |
|                       | number                                  | 18                    | 18                    |           |        |
| <i>Giraffidae</i>     |                                         |                       |                       |           |        |
| KNM ER 1492           | <i>Giraffa pygmaea</i>                  | -10.7                 | 2.1                   | LM3       | KBS    |
| KNM ER 932            | <i>Giraffa stillei</i>                  | -12.1                 | 3.8                   | M3        | KBS    |
| KNM ER 1495           | <i>Giraffa stillei</i>                  | -12.2                 | 3.8                   | M3        | KBS    |
| KNM ER 664            | <i>Giraffa jumae</i>                    | -12.5                 | 2.7                   | M3        | Okote  |
|                       | average                                 | -11.9                 | 3.1                   |           |        |
|                       | SD                                      | 0.8                   | 0.8                   |           |        |
|                       | number                                  | 4                     | 4                     |           |        |
| <i>Hippopotamidae</i> |                                         |                       |                       |           |        |
| KNM ER 2045           | <i>Hippopotamus aethiopicus</i>         | -3.6                  | -5.7                  | Rm1       | Okote  |
| KNM ER 5502           | <i>Hippopotamus aethiopicus</i>         | -2.7                  | 1.2                   | m2        | Okote  |
| KNM ER 5512           | <i>Hippopotamus aethiopicus</i>         | -1.3                  | -4.7                  | M3        | Okote  |
| KNM ER 5573           | <i>Hippopotamus aethiopicus</i>         | -1.0                  | -2.1                  | m2        | Okote  |
| KNM ER 5576           | <i>Hippopotamus aethiopicus</i>         | -1.5                  | -3.0                  | M3        | KBS    |
| KNM ER 638            | <i>Hippopotamus aethiopicus</i>         | -0.3                  | -2.6                  | M3        | KBS    |
| KNM ER 671            | <i>Hippopotamus aethiopicus</i>         | -1.9                  | -2.3                  | RM3       | KBS    |
| KNM ER 1396           | <i>Hippopotamus gorgops</i>             | 0.1                   | -5.7                  | RC        | Okote  |
| KNM ER 1409           | <i>Hippopotamus gorgops</i>             | -1.6                  | -3.9                  | Lm        | Okote  |
| KNM ER 1427           | <i>Hippopotamus gorgops</i>             | -0.7                  | -2.7                  | M2        | Okote  |
| KNM ER 5509           | <i>Hippopotamus gorgops</i>             | -3.0                  | -0.7                  | Rdp4      | KBS    |
| KNM ER 5510           | <i>Hippopotamus gorgops</i>             | -0.2                  | -3.0                  | Lm2       | KBS    |
| KNM ER 5513           | <i>Hippopotamus gorgops</i>             | -0.1                  | -1.8                  | m         | KBS    |
| KNM ER 5543           | <i>Hippopotamus gorgops</i>             | -1.4                  | -4.8                  | Rc        | Okote  |
| KNM ER 637            | <i>Hippopotamus gorgops</i>             | -1.1                  | -0.5                  | RM3       | KBS    |
| KNM ER 1422           | <i>Hippopotamus karumensis</i>          | 0.0                   | -2.7                  | LM3       | KBS    |
| KNM ER 2186           | <i>Hippopotamus karumensis</i>          | -1.8                  | -4.1                  | Rm3       | KBS    |
| KNM ER 5464           | <i>Hippopotamus karumensis</i>          | -0.5                  | -3.8                  | LM3       | KBS    |
| KNM ER 5500           | <i>Hippopotamus karumensis</i>          | -2.1                  | -3.5                  | RM3       | Okote  |
| KNM ER 5501           | <i>Hippopotamus karumensis</i>          | -0.6                  | -5.0                  | LM3       | Okote  |
| KNM ER 5577           | <i>Hippopotamus karumensis</i>          | -0.6                  | -2.6                  | M         | Okote  |
| KNM ER 5648           | <i>Hippopotamus karumensis</i>          | -2.7                  | -5.7                  | M         | KBS    |
| F20004                | <i>Hippopotamus</i> sp.                 | -1.0                  | -4.2                  | p4        | Okote  |
|                       | average                                 | -1.3                  | -3.2                  |           |        |
|                       | SD                                      | 1.0                   | 1.8                   |           |        |
|                       | count                                   | 23                    | 23                    |           |        |
| <i>Suidae</i>         |                                         |                       |                       |           |        |
| KNM ER 3653           | <i>Metridiochoerus andrewsi</i>         | 0.4                   | -0.5                  | Rm3       | KBS    |
| KNM ER 5240           | <i>Metridiochoerus hopwoodi</i>         | 0.4                   | 0.5                   | Rm3       | KBS    |
| KNM ER 3240           | <i>Metridiochoerus compactus</i>        | 0.5                   | 2.4                   | m3        | Okote  |
| KNM ER 3627           | <i>Metridiochoerus compactus</i>        | 0.1                   | 2.9                   | Rm3       | Okote  |
| KNM ER 2719           | <i>Metridiochoerus hopwoodi</i>         | -0.2                  | 1.4                   | m3        | Okote  |

| Sample number | Genus and species            | $\delta^{13}\text{C}$ | $\delta^{18}\text{O}$ | Tooth | Member |
|---------------|------------------------------|-----------------------|-----------------------|-------|--------|
| F15779        | <i>Metridiochoerus</i> sp.   | -0.2                  | -0.3                  | m3    | Okote  |
| F20008        | <i>Metridiochoerus</i> sp.   | 0.2                   | -0.8                  | m3    | Okote  |
| F20009        | <i>Metridiochoerus</i> sp.   | -2.2                  | -0.3                  | m3    | Okote  |
| F20018        | <i>Metridiochoerus</i> sp.   | -0.5                  | -0.5                  | m3    | Okote  |
| F20221        | <i>Metridiochoerus</i> sp.   | -0.7                  | -2.6                  | m2    | Okote  |
|               | average                      | -0.2                  | 0.2                   |       |        |
|               | SD                           | 0.8                   | 1.6                   |       |        |
|               | count                        | 10                    | 10                    |       |        |
| F20206        | <i>Theropithecus oswaldi</i> | -1.0                  | 0.4                   | m2    | Okote  |

**Table S2.  $\delta^{13}\text{C}$  values for hominin and *Theropithecus oswaldi* fossils**

| Specimen number    | Taxon                              | $\delta^{13}\text{C}$ | Tooth  | Site/area    | Member or age, Ma | Ref.       |
|--------------------|------------------------------------|-----------------------|--------|--------------|-------------------|------------|
| ARA-VP-1 1818      | <i>Ardipithecus ramidus</i>        | -10.7                 |        | Aramis       | ARA-VP-1          | 1          |
| ARA-VP-1 3290      | <i>Ardipithecus ramidus</i>        | -10.3                 |        | Aramis       | ARA-VP-1          | 1          |
| ARA-VP-1 3291      | <i>Ardipithecus ramidus</i>        | -11.2                 |        | Aramis       | ARA-VP-1          | 1          |
| ARA-VP-1 700       | <i>Ardipithecus ramidus</i>        | -8.5                  |        | Aramis       | ARA-VP-1          | 1          |
| ARA-VP-6/1 500-90  | <i>Ardipithecus ramidus</i>        | -10.2                 |        | Aramis       | ARA-VP-6          | 1          |
| ARA-VP-6/1 500-113 | <i>Ardipithecus ramidus</i>        | -10.2                 |        | Aramis       | ARA-VP-6          | 1          |
| ARA-VP-6/1 500-115 | <i>Ardipithecus ramidus</i>        | -10.8                 |        | Aramis       | ARA-VP-6          | 1          |
| MLD 30             | <i>Australopithecus africanus</i>  | -5.6                  | RM1    | Makapansgat  | MAK3              | 2          |
| MLD 41             | <i>Australopithecus africanus</i>  | -11.3                 | M      | Makapansgat  | MAK3              | 2          |
| MLD12              | <i>Australopithecus africanus</i>  | -7.7                  | RM3    | Makapansgat  | MAK3              | 2          |
| MLD28              | <i>Australopithecus africanus</i>  | -8.1                  | RM3    | Makapansgat  | MAK3              | 2          |
| STS 31             | <i>Australopithecus africanus</i>  | -6.8                  | RM3    | Sterkfontein | ST4               | 3          |
| STS 32             | <i>Australopithecus africanus</i>  | -7.8                  | RM3    | Sterkfontein | ST4               | 3          |
| STS 2218           | <i>Australopithecus africanus</i>  | -5.9                  | M      | Sterkfontein | ST4               | 3          |
| STS 45             | <i>Australopithecus africanus</i>  | -4.0                  | RM2    | Sterkfontein | ST4               | 3          |
| STS 72             | <i>Australopithecus africanus</i>  | -9.7                  | RM3    | Sterkfontein | ST4               | 3          |
| STW 14             | <i>Australopithecus africanus</i>  | -6.7                  | Lm1    | Sterkfontein | ST4               | 4          |
| STW 211            | <i>Australopithecus africanus</i>  | -7.3                  | M      | Sterkfontein | ST4               | 4          |
| STW 229            | <i>Australopithecus africanus</i>  | -5.8                  | P      | Sterkfontein | ST4               | 4          |
| STW 252            | <i>Australopithecus africanus</i>  | -7.4                  | RM1    | Sterkfontein | ST4               | 4          |
| STW 276            | <i>Australopithecus africanus</i>  | -8.0                  | Lm1    | Sterkfontein | ST4               | 4          |
| STW 303            | <i>Australopithecus africanus</i>  | -4.3                  | RM2    | Sterkfontein | ST4               | 4          |
| STW 304            | <i>Australopithecus africanus</i>  | -7.4                  | M      | Sterkfontein | ST4               | 4          |
| STW 309b (409)     | <i>Australopithecus africanus</i>  | -6.1                  | Lm1    | Sterkfontein | ST4               | 4          |
| STW 315            | <i>Australopithecus africanus</i>  | -5.7                  | Ldm2   | Sterkfontein | ST4               | 4          |
| STW 73             | <i>Australopithecus africanus</i>  | -8.8                  | RM2    | Sterkfontein | ST4               | 4          |
| STW 207            | <i>Australopithecus africanus?</i> | -2.0                  | ?      | Sterkfontein | ST4               | 4          |
| STW 213i           | <i>Australopithecus africanus?</i> | -1.8                  | Lm1    | Sterkfontein | ST4               | 4          |
| STW 236            | <i>Australopithecus africanus?</i> | -3.7                  | P      | Sterkfontein | ST4               | 4          |
| SK 27              | <i>Homo</i> sp.                    | -8.2                  | LM3    | Swartkrans   | SK1               | 5          |
| SK 80/847          | <i>Homo</i> sp.                    | -7.1                  | P      | Swartkrans   | SK1               | 5          |
| SK 2635            | <i>Homo</i> sp.                    | -9.2                  | P      | Swartkrans   | SK1               | 5          |
| OH62               | <i>Homo habilis</i>                | -8.3                  | LM2    | Olduvai      | 1.8               | 6          |
| OH65               | <i>Homo habilis</i>                | -5.2                  | LM3    | Olduvai      | 1.8               | 6          |
| OH7                | <i>Homo habilis</i>                | -8.8                  | Lm2    | Olduvai      | 1.75              | 6          |
| SK 19              | <i>Paranthropus robustus</i>       | -6.3                  | Rm3    | Swartkrans   | SK1               | 3          |
| SK 41              | <i>Paranthropus robustus</i>       | -6.7                  | LM3    | Swartkrans   | SK1               | 3          |
| SK 57              | <i>Paranthropus robustus</i>       | -6.5                  | LM3    | Swartkrans   | SK1               | 3          |
| SK 876             | <i>Paranthropus robustus</i>       | -6.7                  | M      | Swartkrans   | SK1               | 5          |
| SK 878             | <i>Paranthropus robustus</i>       | -6.8                  | Rp3    | Swartkrans   | SK1               | 7          |
| SK 879             | <i>Paranthropus robustus</i>       | -8.5                  | M      | Swartkrans   | SK1               | 7          |
| SK 879             | <i>Paranthropus robustus</i>       | -8.1                  | M      | Swartkrans   | SK1               | 7          |
| SK1512             | <i>Paranthropus robustus</i>       | -8.8                  | P      | Swartkrans   | SK1               | 7          |
| SK 14000           | <i>Paranthropus robustus</i>       | -5.9                  | LM3    | Swartkrans   | SK1               | 3          |
| SK 14132           | <i>Paranthropus robustus</i>       | -6.9                  | RM3    | Swartkrans   | SK1               | 3          |
| SK 24605           | <i>Paranthropus robustus</i>       | -7.3                  | RM3    | Swartkrans   | SK1               | 8          |
| SK 24606           | <i>Paranthropus robustus</i>       | -6.1                  | RM2    | Swartkrans   | SK1               | 8          |
| SKW 6              | <i>Paranthropus robustus</i>       | -7.0                  | LM3    | Swartkrans   | SK1               | 3          |
| SKW 3068           | <i>Paranthropus robustus</i>       | -8.1                  | LM2    | Swartkrans   | SK1               | 3          |
| SKW 4768           | <i>Paranthropus robustus</i>       | -7.4                  | LM2    | Swartkrans   | SK1               | 3          |
| SKW 6427           | <i>Paranthropus robustus</i>       | -8.6                  | M      | Swartkrans   | SK1               | 8          |
| SKX 5939           | <i>Paranthropus robustus</i>       | -5.4                  | M      | Swartkrans   | SK1               | 8          |
| SKX 333            | <i>Paranthropus robustus</i>       | -10.0                 | Rm1    | Swartkrans   | SK2               | 7          |
| SKX 1312           | <i>Paranthropus robustus</i>       | -8.1                  | LM1    | Swartkrans   | SK2               | 7          |
| SKX 5015           | <i>Paranthropus robustus</i>       | -9.6                  | Lm3    | Swartkrans   | SK1               | 7          |
| SKX 35025          | <i>Paranthropus robustus</i>       | -7.9                  | RM     | Swartkrans   | SK3               | 7          |
| TM 1600            | <i>Paranthropus robustus</i>       | -7.9                  | Lm2    | Kromdraai    | KB3               | 3          |
| KNM-CH-302         | <i>Paranthropus boisei</i>         | -1.3                  | m-frag | Baringo      | 1.42              | this study |

| Specimen number | Taxon                        | $\delta^{13}\text{C}$ | Tooth    | Site/area  | Member or age, Ma | Ref.       |
|-----------------|------------------------------|-----------------------|----------|------------|-------------------|------------|
| KNM-ER-729A     | <i>Paranthropus boisei</i>   | 0.0                   | Lp4      | Turkana    | 1.52              | this study |
| KNM-ER-732A     | <i>Paranthropus boisei</i>   | -0.1                  | P4       | Turkana    | 1.58              | this study |
| KNM-ER-733A     | <i>Paranthropus boisei</i>   | -1.5                  | Rm3      | Turkana    | 1.52              | this study |
| KNM-ER-733D     | <i>Paranthropus boisei</i>   | -0.5                  | LP4      | Turkana    | 1.52              | this study |
| KNM-ER-802D     | <i>Paranthropus boisei</i>   | -0.1                  | Lm1      | Turkana    | 1.58              | this study |
| KNM-ER-802G     | <i>Paranthropus boisei</i>   | -1.9                  | m3       | Turkana    | 1.59              | this study |
| KNM-ER-810      | <i>Paranthropus boisei</i>   | -3.4                  | p3       | Turkana    | 1.77              | this study |
| KNM-ER-816B     | <i>Paranthropus boisei</i>   | -1.9                  | RP4      | Turkana    | 1.77              | this study |
| KNM-ER-818      | <i>Paranthropus boisei</i>   | 0.7                   | Lm3      | Turkana    | 1.60              | this study |
| KNM-ER-1171C    | <i>Paranthropus boisei</i>   | -0.6                  | Lm1      | Turkana    | 1.58              | this study |
| KNM-ER-13750    | <i>Paranthropus boisei</i>   | 0.2                   | m-frag   | Turkana    | 1.87              | this study |
| KNM-ER-1469A    | <i>Paranthropus boisei</i>   | -2.3                  | Lm3      | Turkana    | 1.89              | this study |
| KNM-ER-1479A    | <i>Paranthropus boisei</i>   | -2.3                  | m3       | Turkana    | 1.87              | this study |
| KNM-ER-15940    | <i>Paranthropus boisei</i>   | -1.1                  | Lm3      | Turkana    | 1.77              | this study |
| KNM-ER-1804     | <i>Paranthropus boisei</i>   | -1.2                  | LM3      | Turkana    | 1.77              | this study |
| KNM-ER-1806C    | <i>Paranthropus boisei</i>   | -1.3                  | Rm3      | Turkana    | 1.85              | this study |
| KNM-ER-3737B    | <i>Paranthropus boisei</i>   | -1.6                  | Rm1      | Turkana    | 1.58              | this study |
| KNM-ER-3887     | <i>Paranthropus boisei</i>   | -1.6                  | RM3      | Turkana    | 1.57              | this study |
| KNM-ER-3952F    | <i>Paranthropus boisei</i>   | -1.3                  | LM3      | Turkana    | 1.87              | this study |
| KNM-ER-6080     | <i>Paranthropus boisei</i>   | -2.2                  | Rm2      | Turkana    | 1.60              | this study |
| KNM-WT-17396    | <i>Paranthropus boisei</i>   | -1.9                  | Lm3      | Turkana    | 1.72              | this study |
| KNM-WT-37100    | <i>Paranthropus boisei</i>   | -1.8                  | m2 or m3 | Turkana    | 1.72              | this study |
| KNM-WT-37748    | <i>Paranthropus boisei</i>   | -2.1                  | RM3      | Turkana    | 1.72              | this study |
| OH5             | <i>Paranthropus boisei</i>   | -1.2                  | LM2      | Olduvai    | 1.82              | 6          |
| Peninj          | <i>Paranthropus boisei</i>   | -0.7                  | Lm2      | Peninj     | 1.62              | 6          |
| F20206          | <i>Theropithecus oswaldi</i> | -1.0                  | m2       | Turkana    | Okote             | this study |
| SK 14162        | <i>Theropithecus oswaldi</i> | -3.7                  | M        | Swartkrans | SK1               | 9          |
| SK 2158         | <i>Theropithecus oswaldi</i> | -0.4                  | M        | Swartkrans | SK1               | 9          |
| SK 2181         | <i>Theropithecus oswaldi</i> | -2.6                  | M2       | Swartkrans | SK1               | 10         |
| SK 403          | <i>Theropithecus oswaldi</i> | -5.3                  | M        | Swartkrans | SK1               | 10         |
| SK 411          | <i>Theropithecus oswaldi</i> | -4.0                  | M        | Swartkrans | SK1               | 9          |
| SK 491          | <i>Theropithecus oswaldi</i> | -1.6                  | M        | Swartkrans | SK1               | 10         |
| SK 495          | <i>Theropithecus oswaldi</i> | -2.8                  | M        | Swartkrans | SK1               | 9          |
| SK 507          | <i>Theropithecus oswaldi</i> | -0.3                  | M        | Swartkrans | SK1               | 9          |
| SK 581          | <i>Theropithecus oswaldi</i> | -2.4                  | M        | Swartkrans | SK1               | 10         |
| SK 597          | <i>Theropithecus oswaldi</i> | -1.3                  | M        | Swartkrans | SK1               | 10         |
| SKX 616         | <i>Theropithecus oswaldi</i> | -1.1                  | M        | Swartkrans | SK2               | 10         |

- 1 White TD, et al (2009) Macrovertebrate paleontology and the Pliocene habitat of *Ardipithecus ramidus*. *Science* 326:87–93.
- 2 Sponheimer M, Lee-Thorp JA (1999) Isotopic evidence for the diet of an early hominid, *Australopithecus africanus*. *Science* 283:368–370.
- 3 Sponheimer M, et al (2005). Hominins, sedges, and termites: New carbon isotope data from the Sterkfontein Valley and Kruger National Park. *J Hum Evol* 48:301–312.
- 4 van der Merwe NJ, Thackeray JF, Lee-Thorp JA, Luyt J (2003) The carbon isotope ecology and diet of *Australopithecus africanus* at Sterkfontein, South Africa. *J Hum Evol* 44:581–597.
- 5 Lee-Thorp JA, Thackeray JF, van der Merwe NJ (2000) The hunters and the hunted revisited. *J Hum Evol* 39:565–576.
- 6 van der Merwe NJ, Masao FT, Bamford MK (2008) Isotopic evidence for contrasting diets of early hominins *Homo habilis* and *Australopithecus boisei* of Tanzania. *S Afr J Sci* 104:153–155.
- 7 Lee-Thorp JA, van der Merwe NJ, Brain CK (1994) Diet of *Australopithecus robustus* at Swartkrans from stable carbon isotopic analysis. *J Hum Evol* 27:361–372.
- 8 Sponheimer M, et al (2006) Isotopic evidence for dietary variability in the early hominin *Paranthropus robustus*. *Science* 314:980–982.
- 9 Lee-Thorp JA, van der Merwe NJ, Brain CK. (1989) Isotopic evidence for dietary differences between two extinct baboon species from Swartkrans. *J Hum Evol* 18:183–189.
- 10 Codron D, et al. (2005) Utilization of savanna-based resources by Plio-Pleistocene baboons. *S Afr J Sci* 101:245–248.

**Table S3. Modern samples from Tsavo National Park**

| Sample            | Species                       | Year of death | $\delta^{13}\text{C}$ measured | $\delta^{13}\text{C}$ corrected to 1750* | $\delta^{18}\text{O}$ | Tooth |
|-------------------|-------------------------------|---------------|--------------------------------|------------------------------------------|-----------------------|-------|
| <i>Equidae</i>    |                               |               |                                |                                          |                       |       |
| K00-Tsv-215       | <i>Equus burchelli</i>        | 2000          | 0.7                            | 2.0                                      | 0.3                   | M3    |
| K00-Tsv-219       | <i>Equus burchelli</i>        | 2000          | 0.2                            | 1.5                                      | 1.7                   | M3    |
| K98-Tsv-139       | <i>Equus burchelli</i>        | 1970          | 0.5                            | 1.2                                      | 6                     | M3    |
| K98-Tsv-140       | <i>Equus burchelli</i>        | 1970          | 0.8                            | 1.5                                      | 3.5                   | M3    |
| K98-Tsv-141       | <i>Equus burchelli</i>        | 1970          | 0.1                            | 0.8                                      | 5.9                   | M3    |
| K98-Tsv-142       | <i>Equus burchelli</i>        | 1970          | 0.2                            | 0.9                                      | 3.8                   | P4    |
| K99-139-Tsv       | <i>Equus burchelli</i>        | 1998          | 1.0                            | 2.3                                      | 2.9                   | M3    |
|                   | average                       |               | 1.4                            | 3.4                                      |                       |       |
|                   | SD                            |               | 0.6                            | 2.1                                      |                       |       |
|                   | number                        |               | 7                              | 7                                        |                       |       |
| <i>Giraffidae</i> |                               |               |                                |                                          |                       |       |
| K99-136-Tsv       | <i>Giraffa camelopardalis</i> | 1999          | -14.2                          | -12.9                                    | 3.3                   | M3    |
| K00-Tsv-111       | <i>Giraffa camelopardalis</i> | 1970          | -11.8                          | -11.0                                    | 5.5                   | p2    |
| K00-Tsv-112       | <i>Giraffa camelopardalis</i> | 1970          | -11.9                          | -11.2                                    | 3.7                   | p2    |
| K00-Tsv-114       | <i>Giraffa camelopardalis</i> | 1970          | -11.1                          | -10.4                                    | 5.3                   | p2    |
| K00-Tsv-131       | <i>Giraffa camelopardalis</i> | 1970          | -10.7                          | -10.0                                    | 3.9                   | p2    |
| K00-Tsv-147       | <i>Giraffa camelopardalis</i> | 1970          | -11.1                          | -10.4                                    | 3.9                   | p2    |
| K08-TSV-209e      | <i>Giraffa camelopardalis</i> | 2008          | -14.1                          | -12.6                                    | -0.2                  | M3    |

| Sample                | Species                       | Year of death | $\delta^{13}\text{C}$ measured | $\delta^{13}\text{C}$ corrected to 1750* | $\delta^{18}\text{O}$ | Tooth |
|-----------------------|-------------------------------|---------------|--------------------------------|------------------------------------------|-----------------------|-------|
| ODW 6                 | <i>Giraffa camelopardalis</i> | 1995          | -12.1                          | -11.0                                    | 4.2                   | M3    |
|                       | average                       |               | -11.2                          | 3.7                                      |                       |       |
|                       | SD                            |               | 1.1                            | 1.7                                      |                       |       |
|                       | number                        |               | 8                              | 8                                        |                       |       |
| <i>Hippopotamidae</i> |                               |               |                                |                                          |                       |       |
| K08-TSV-201-C-ave     | <i>Hippopotamus amphibius</i> | 2007          | -4.8                           | -3.4                                     | -2.2                  | C     |
| K08-TSV-208e          | <i>Hippopotamus amphibius</i> | 2007          | -2.9                           | -1.5                                     | -3.8                  | C     |
| K99-133-TSV           | <i>Hippopotamus amphibius</i> | 1999          | -2.6                           | -1.3                                     | -3.1                  | M3    |
| K99-133-TSV           | <i>Hippopotamus amphibius</i> | 1999          | -1.8                           | -0.6                                     | -2.6                  | M2    |
| K00-Tsv-200           | <i>Hippopotamus amphibius</i> | 1996          | -5.9                           | -4.7                                     | -1.8                  | m3    |
| K00-TSV-226-M/3       | <i>Hippopotamus amphibius</i> | 1999          | -2.8                           | -1.6                                     | -3.0                  | m3    |
|                       | average                       |               | -2.2                           | -2.8                                     |                       |       |
|                       | SD                            |               | 1.5                            | 0.7                                      |                       |       |
|                       | number                        |               | 6                              | 6                                        |                       |       |
| <i>Suidae</i>         |                               |               |                                |                                          |                       |       |
| K08-TSV-205-C-ave     | <i>Phacochoerus africanus</i> | 2007          | -0.8                           | 0.6                                      | 1.4                   | C     |
| K08-TSV-216e          | <i>Phacochoerus africanus</i> | 2007          | 1.2                            | 2.6                                      | 0.1                   | c     |
| K98-Tsv-164           | <i>Phacochoerus africanus</i> | 1970          | -0.7                           | 0.1                                      | 2.7                   | M2    |
| K98-Tsv-165           | <i>Phacochoerus africanus</i> | 1970          | 0.2                            | 0.9                                      | 0.7                   | M3    |
|                       | average                       |               | 1                              | 1.2                                      |                       |       |
|                       | SD                            |               | 1.1                            | 1.1                                      |                       |       |
|                       | number                        |               | 4                              | 4                                        |                       |       |

\* $\delta^{13}\text{C}$  values are corrected to 1750 due to changes in the isotope composition of the atmosphere (1–3).

- 1 Cerling TE, Harris JM (1999) Carbon isotope fractionation between diet and bioapatite in ungulate mammals and implications for ecological and paleoecological studies. *Oecologia* 120:347–363.
- 2 Francey RJ, et al (1999) A 1000-year high precision record of  $\delta^{13}\text{C}$  in atmospheric  $\text{CO}_2$ . *Tellus* 51:170–193.
- 3 Keeling RF, Piper, SC, Bollenbacher AF, Walker SJ (2010) Monthly atmospheric  $^{13}\text{C}/^{12}\text{C}$  isotopic ratios for 11 SIO stations. *Trends: A Compendium of Data on Global Change* (Carbon Dioxide Information Analysis Center, Oak Ridge National Laboratory, US Department of Energy, Oak Ridge, TN).

**Table S4. Treated (TRT) vs. untreated (UNT)  $\text{CO}_2$  yields, and isotope data for four *Paranthropus boisei* specimens**

| Specimen            | $\text{CO}_2$ yield, $\mu\text{mol}/\text{mg}$ | $\delta^{13}\text{C}$ | $\delta^{18}\text{O}$ |
|---------------------|------------------------------------------------|-----------------------|-----------------------|
| <b>ER-810-UNT</b>   | <b>1.34</b>                                    | -2.4                  | -2.2                  |
| ER-810-TRT          | 0.75                                           | -3.4                  | -3.3                  |
| <b>ER-1806C-UNT</b> | <b>1.81</b>                                    | -4.0                  | -2.7                  |
| ER-1806C-TRT        | 0.59                                           | -1.3                  | -2.0                  |
| ER-818-UNT          | 0.70                                           | 0.2                   | 1.5                   |
| ER-818-TRT          | 0.59                                           | 0.7                   | 1.9                   |
| ER-729-UNT          | 0.64                                           | -0.2                  | -0.1                  |
| ER-729-TRT          | 0.44                                           | 0.0                   | -0.7                  |

Enamel samples with yields in **bold** contain exogenous carbonate.
